# Supplementary material for: Diversity and Bioactive Potential of Actinobacteria from Unexplored Regions of Western Ghats, India
Source: MDPI journal article supplement (doi:10.3390/microorganisms8020225), 2020-02-07
Supplement: s1 [file s1]

# Diversity and Bioactive Potential of Actinobacteria from unexplored regions of Western Ghats, India

Saket Siddharth, Ravishankar Rai V, Joachim Wink and Michael Steinert

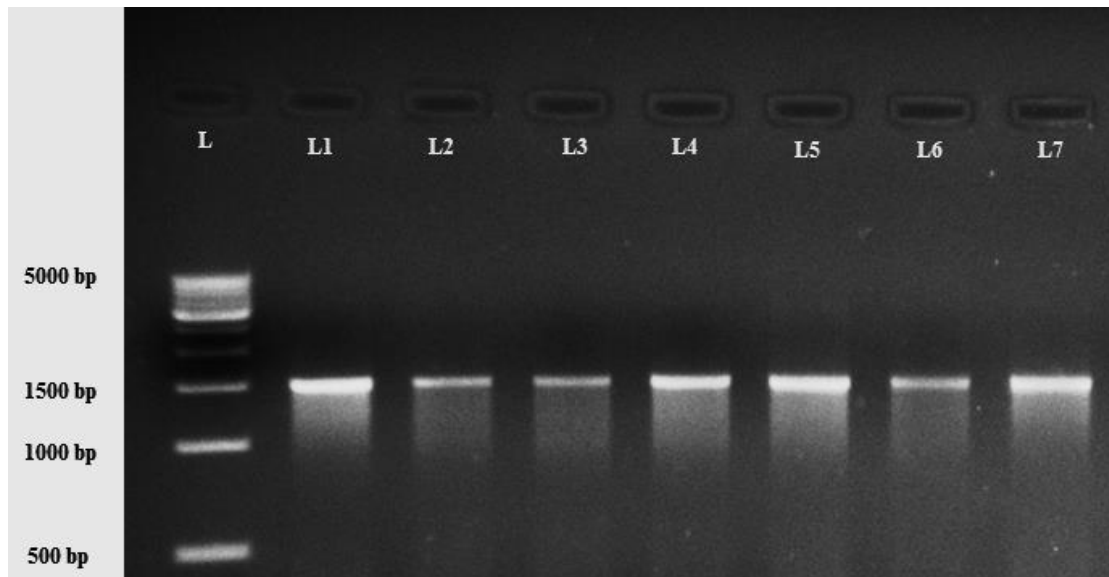

**Figure 1.** Agarose gel electrophoresis (1.5%) of PCR amplified products of 16S-rRNA genes. *L*: 500bp DNA ladder, *L1*: Amplified PCR product of strain S1A, *L2*: Amplified PCR product of strain SS4, *L3*: Amplified PCR product of strain SS5, *L4*: Amplified PCR product of strain SS6, *L5*: Amplified PCR product of strain SCA35, *L6*: Amplified PCR product of strain SCA11, *L7*: Amplified PCR product of strain SCA13.
